# Supplementary material for: A first-principles study on the properties of Sn-doped LiCoO2 for Li-ion batteries
Source: Royal Society of Chemistry journal article supplement (doi:10.1039/d1dt00301a), 2021-01-01
Supplement: d1dt00301a1.pdf [file d1dt00301a1.pdf]

## Supporting Information

### **First-principles study on properties of Sn-doped LiCoO<sub>2</sub> for Li-ion batteries**

Ruhan Yang<sup>a</sup>, Mengke Guan<sup>a</sup>, Ruirui Zhao<sup>\*a</sup> and Qiong Luo<sup>\*a</sup>

<sup>a</sup>Key Laboratory of Theoretical Chemistry of Environment, Ministry of Education; Center for Computational Quantum Chemistry, School of Chemistry, South China Normal University, Guangzhou, 510006, P. R. China.

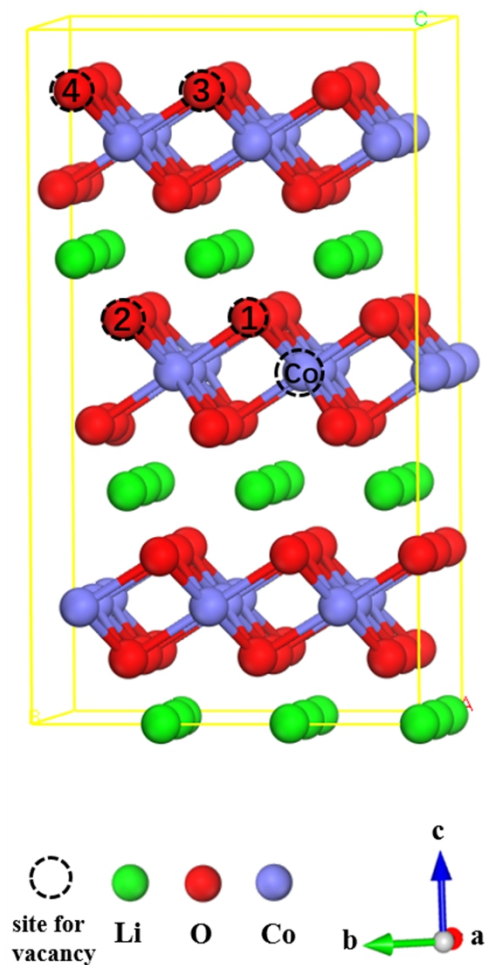

Fig. S1. Possible relative positions between Co vacancy and O vacancy of the pair of Co-O vacancies in LCO.

Table. S1. Lattice parameters, volume and energy of LCO containing a pair of Co-O vacancies.

| Structure <sup>a</sup> | a/ Å  | b/ Å  | c/ Å   | $\alpha/^\circ$ | $\beta/^\circ$ | $\gamma/^\circ$ | V/ Å <sup>3</sup> | E/eV     |
|------------------------|-------|-------|--------|-----------------|----------------|-----------------|-------------------|----------|
| LCO <sub>1</sub>       | 8.455 | 8.455 | 13.685 | 90.075          | 89.925         | 119.964         | 847.419           | -607.404 |
| LCO <sub>2</sub>       | 8.471 | 8.460 | 13.668 | 89.917          | 90.026         | 120.046         | 847.906           | -607.025 |
| LCO <sub>3</sub>       | 8.446 | 8.445 | 13.689 | 90.013          | 90.001         | 120.005         | 845.543           | -605.566 |
| LCO <sub>4</sub>       | 8.456 | 8.449 | 13.675 | 90.067          | 90.021         | 120.034         | 854.808           | -606.081 |

<sup>a</sup>The four structures have the same Co vacancy site as shown in Fig. S1.

The subscript number (1, 2, 3, or 4) refers to the position of O vacancy in LCO marked in Fig. S1.

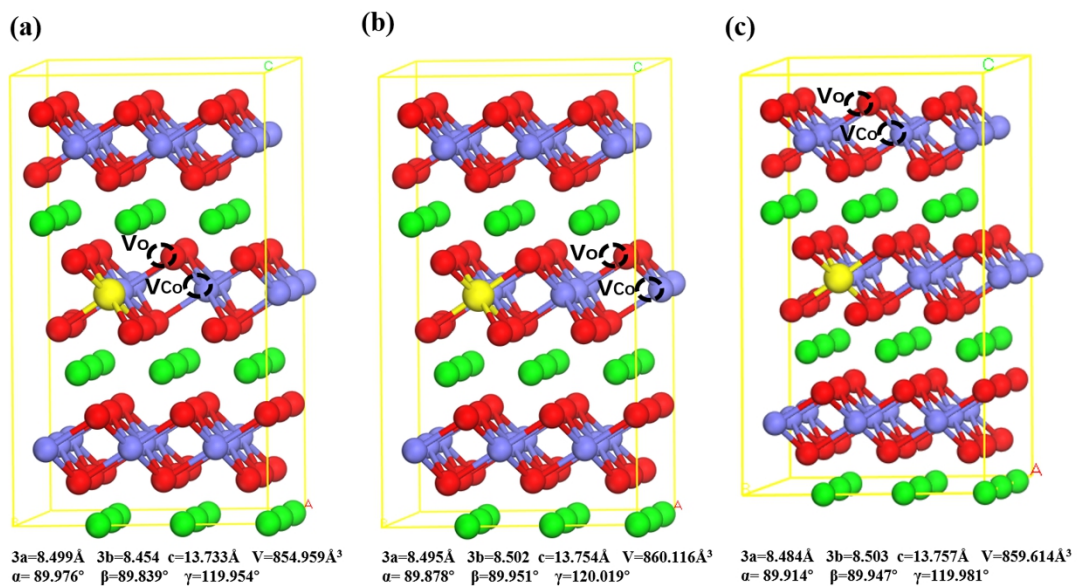

Fig. S2. Atomic configurations for the structure (a) where the doped Sn atom directly neighbors to the pair of Co-O vacancies, (b) where the doped Sn atom and the Co-O vacancies are in the same layer but not neighbor to each other, and (c) where the doped Sn atom and the Co-O vacancies are positioned in different layers.

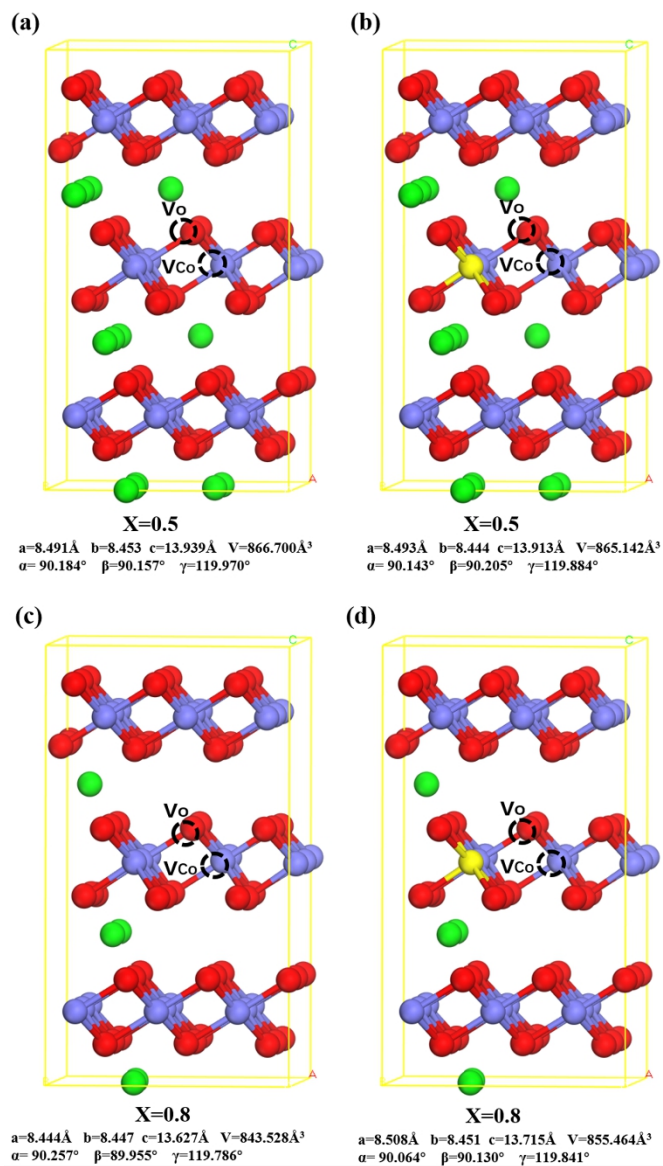

Fig. S3. The structures for vLCO with the degrees of delithiation at 50% (a) and 80% (c), respectively, along with the structures for vSLCO with the degrees of delithiation at 50% (b) and 80% (d), respectively.

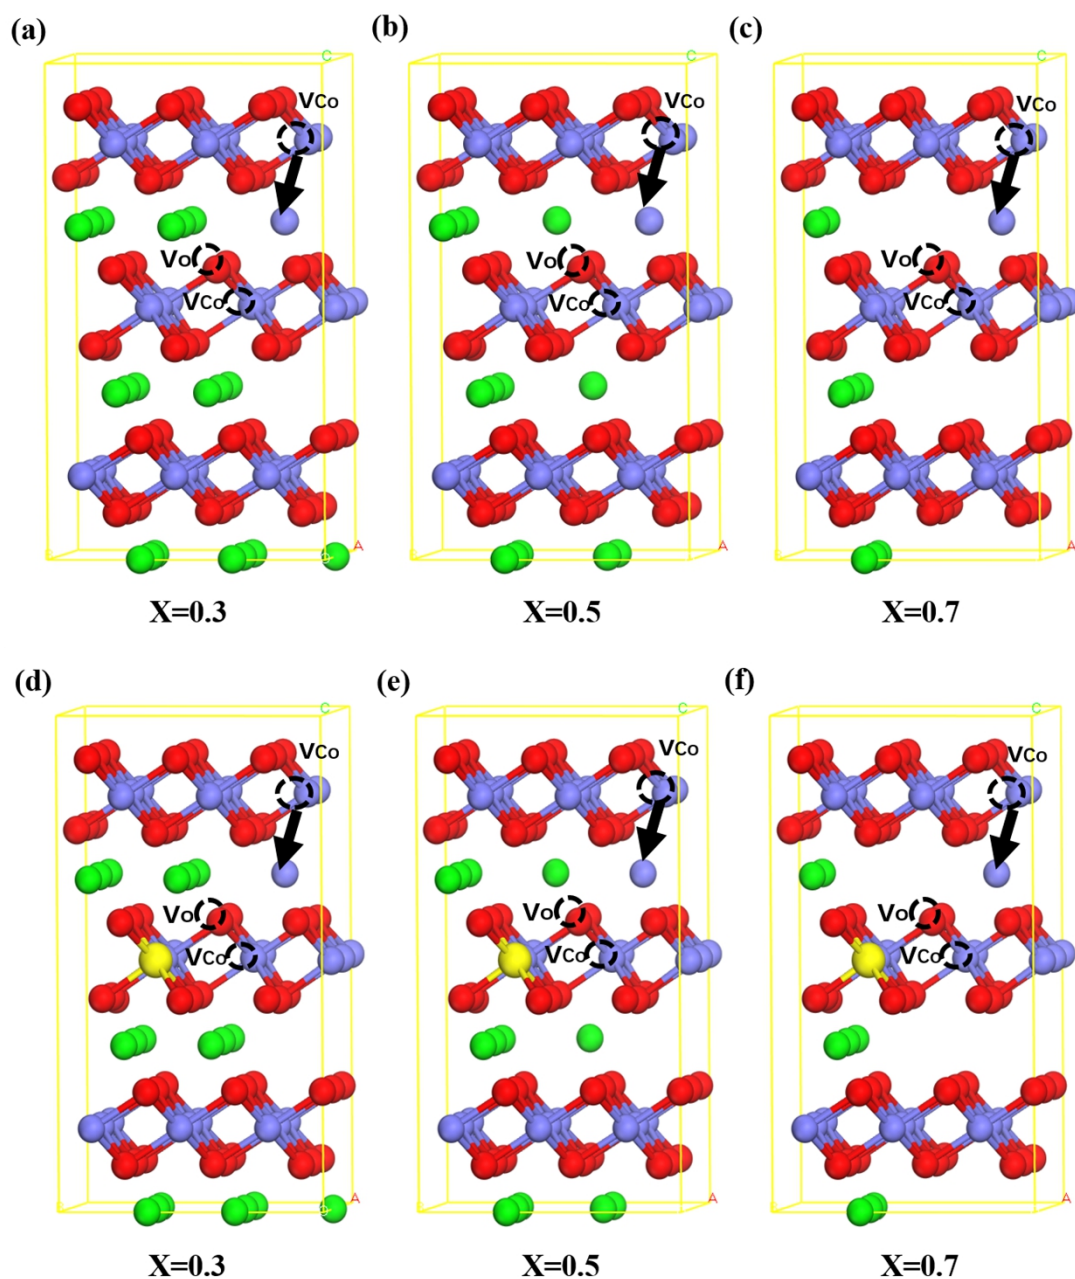

Fig. S4. The structures of vLCO containing cationic disorder with the degrees of delithiation at 30% (a), 50% (b), and 70% (c), along with the structures of vSLCO containing cationic disorder with the degrees of delithiation at at 30% (d), 50% (e) and 70% (f), respectively.

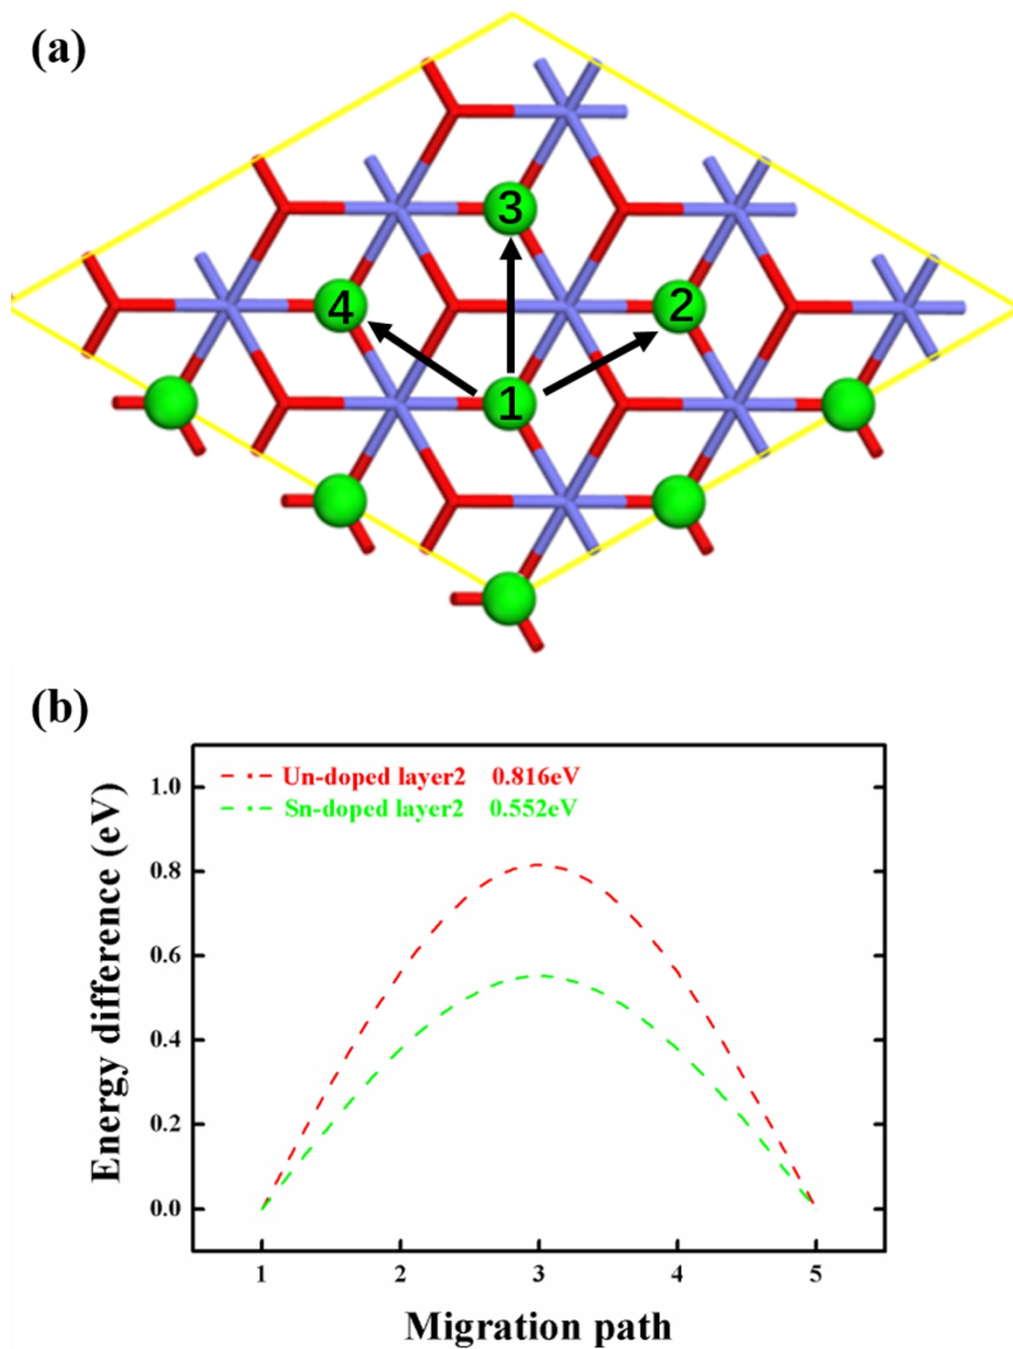

Fig. S5 (a) Three paths for Li migrating within the Li layer that is not adjacent to the Co-O layer containing the Co-O vacancies. (b) Energy profile of the Li ion migration which is the average energy profile across the three paths shown in Fig. S5 (a).
